# Supplementary material for: Identification of iridoid synthases from Nepeta species: Iridoid cyclization does not determine nepetalactone stereochemistry
Source: PubMed Central journal article supplement (PMC5739345; doi:10.1016/j.phytochem.2017.10.004), 2018-01

**Supplementary materials and methods for:**

**Identification of iridoid synthases from *Nepeta* species:**

**Iridoid cyclization does not determine nepetalactone stereochemistry**

Nathaniel H. Sherden<sup>1</sup>, Benjamin Lichman<sup>1</sup>, Lorenzo Caputi<sup>1</sup>, Dongyan Zhao<sup>2</sup>, Mohamed O. Kamileen<sup>1</sup>, C. Robin Buell<sup>2</sup>, Sarah E. O'Connor<sup>1\*</sup>

**Supplementary Figure. <sup>1</sup>H NMR spectra**

8-oxogeranial

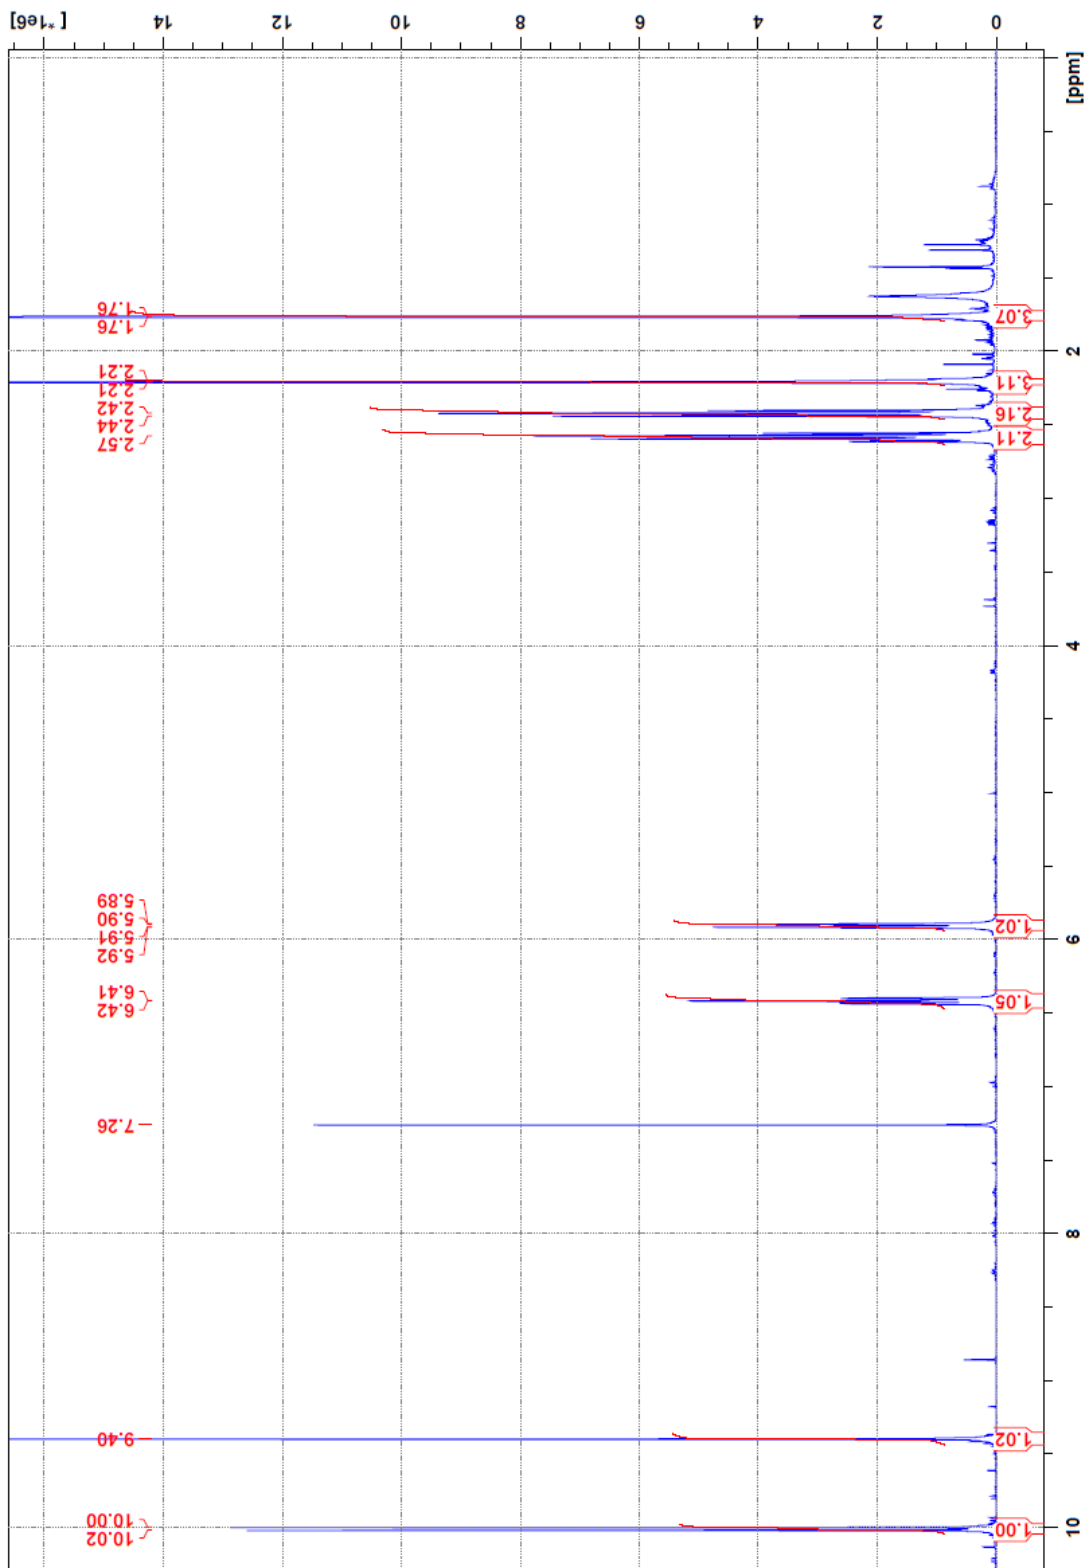

*Cis-trans*-nepetalactol

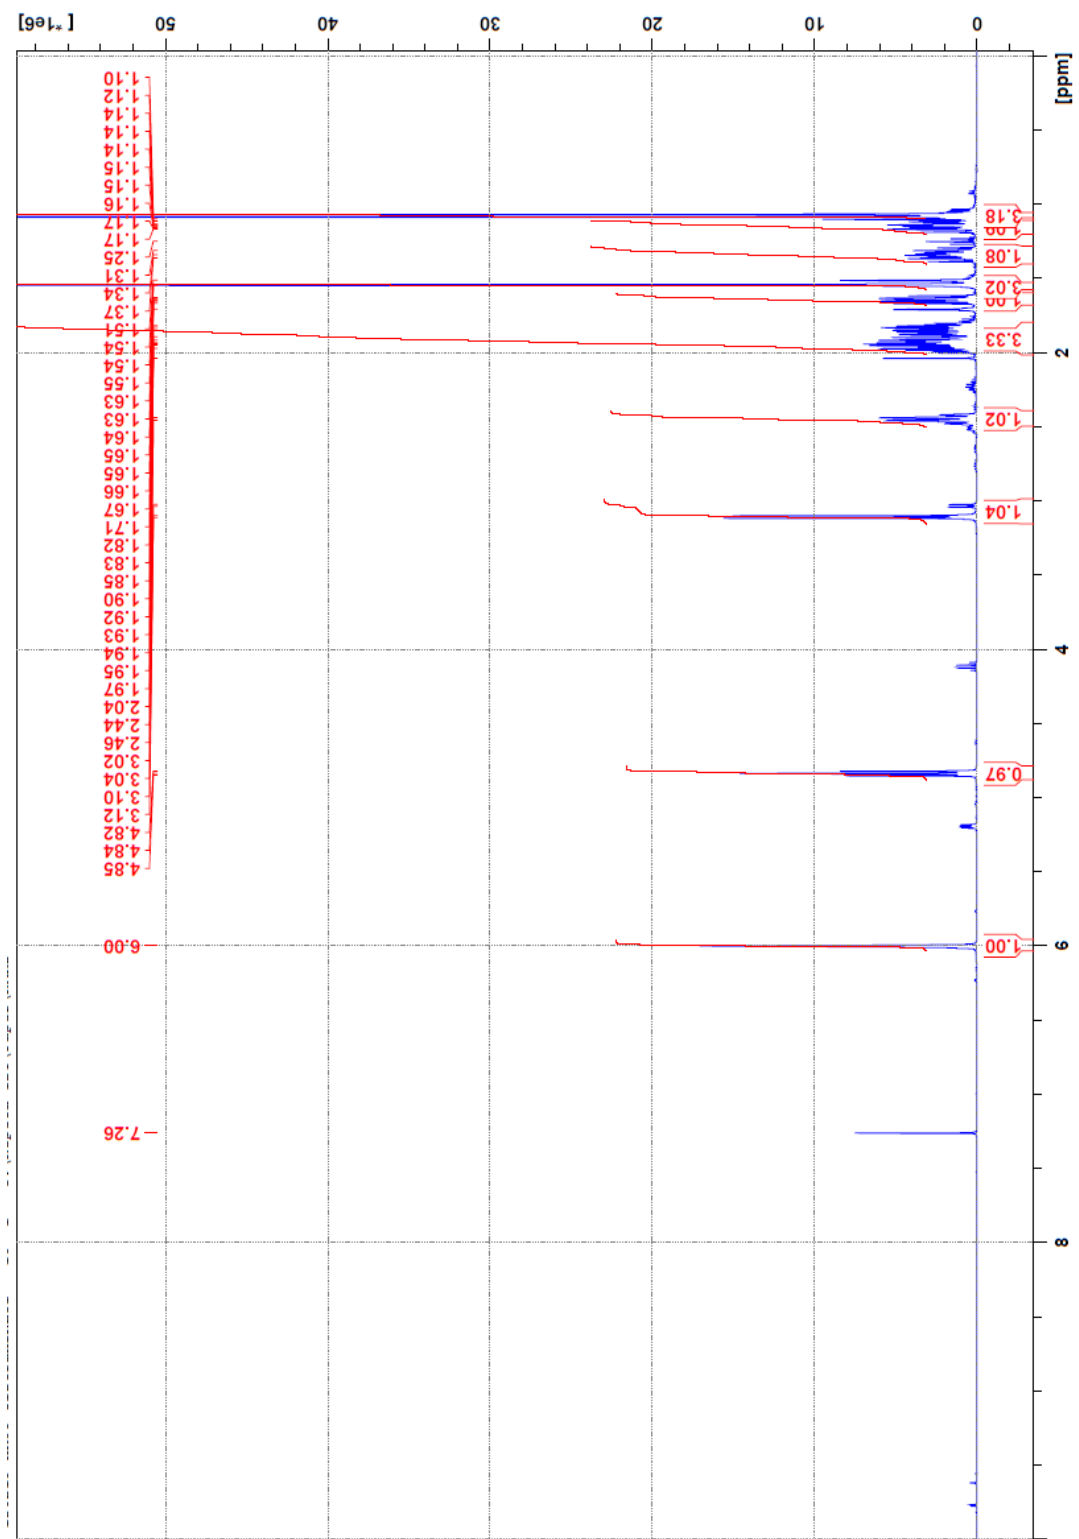

*Cis-trans*-nepetalactone

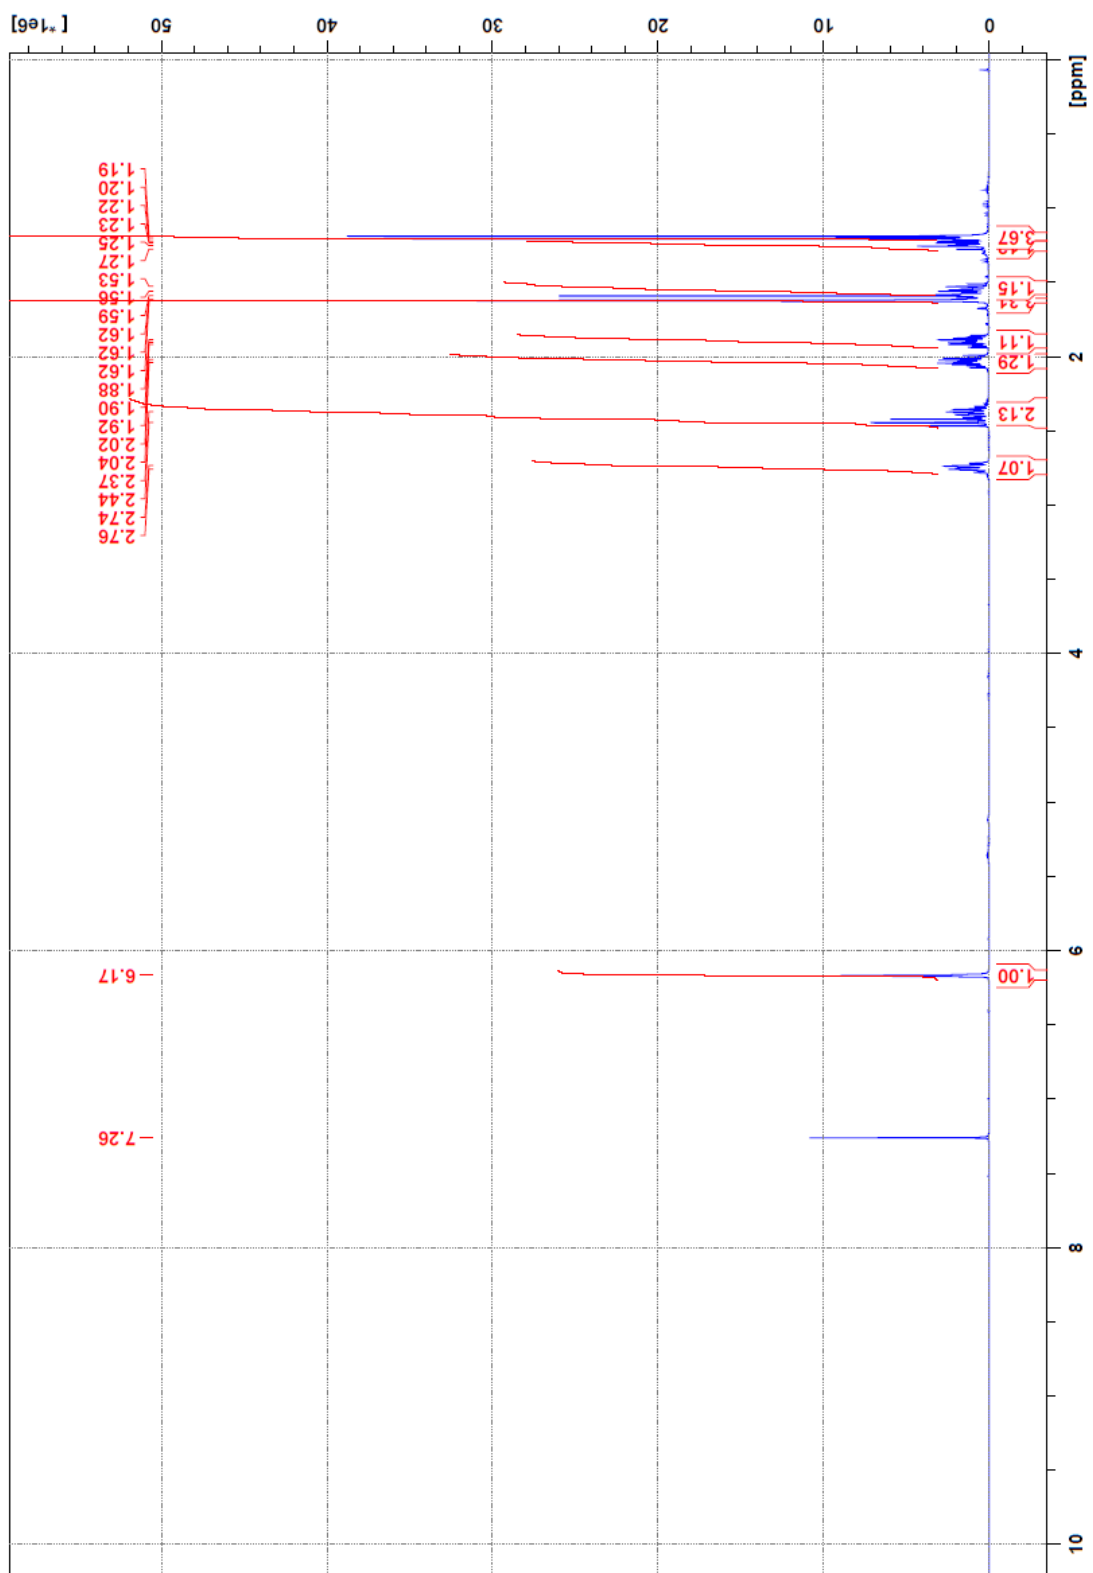

*Trans-cis-nepetalactone*

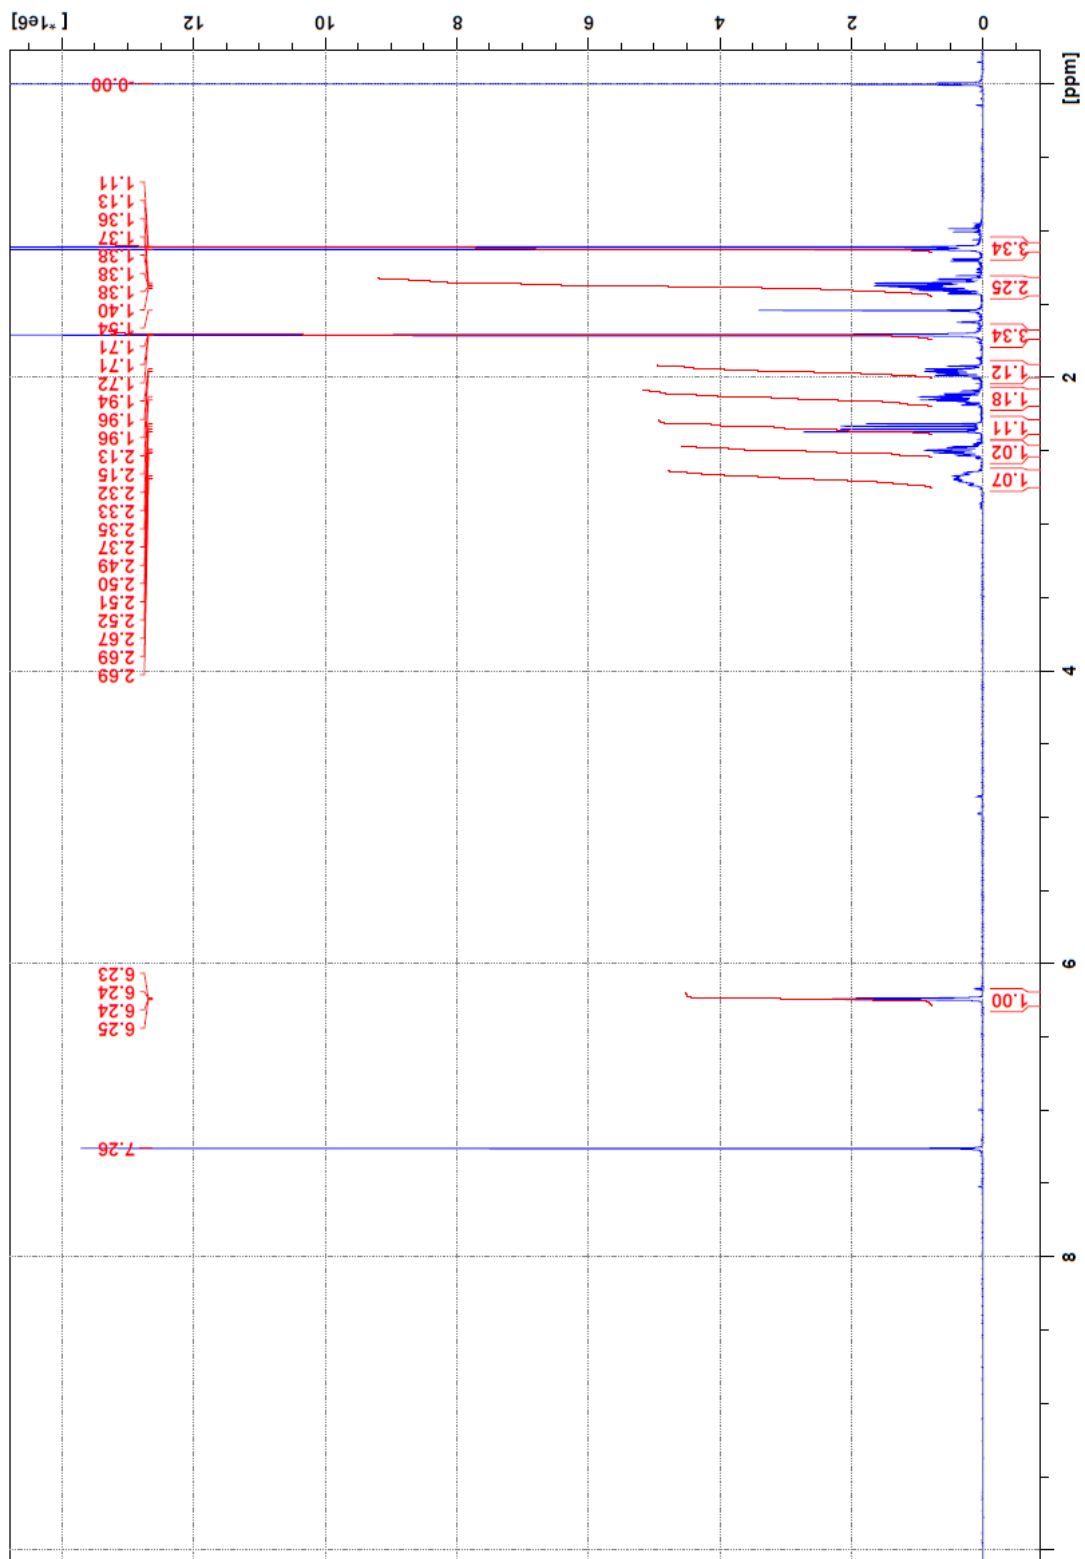

Trans-cis-iridodial 1H

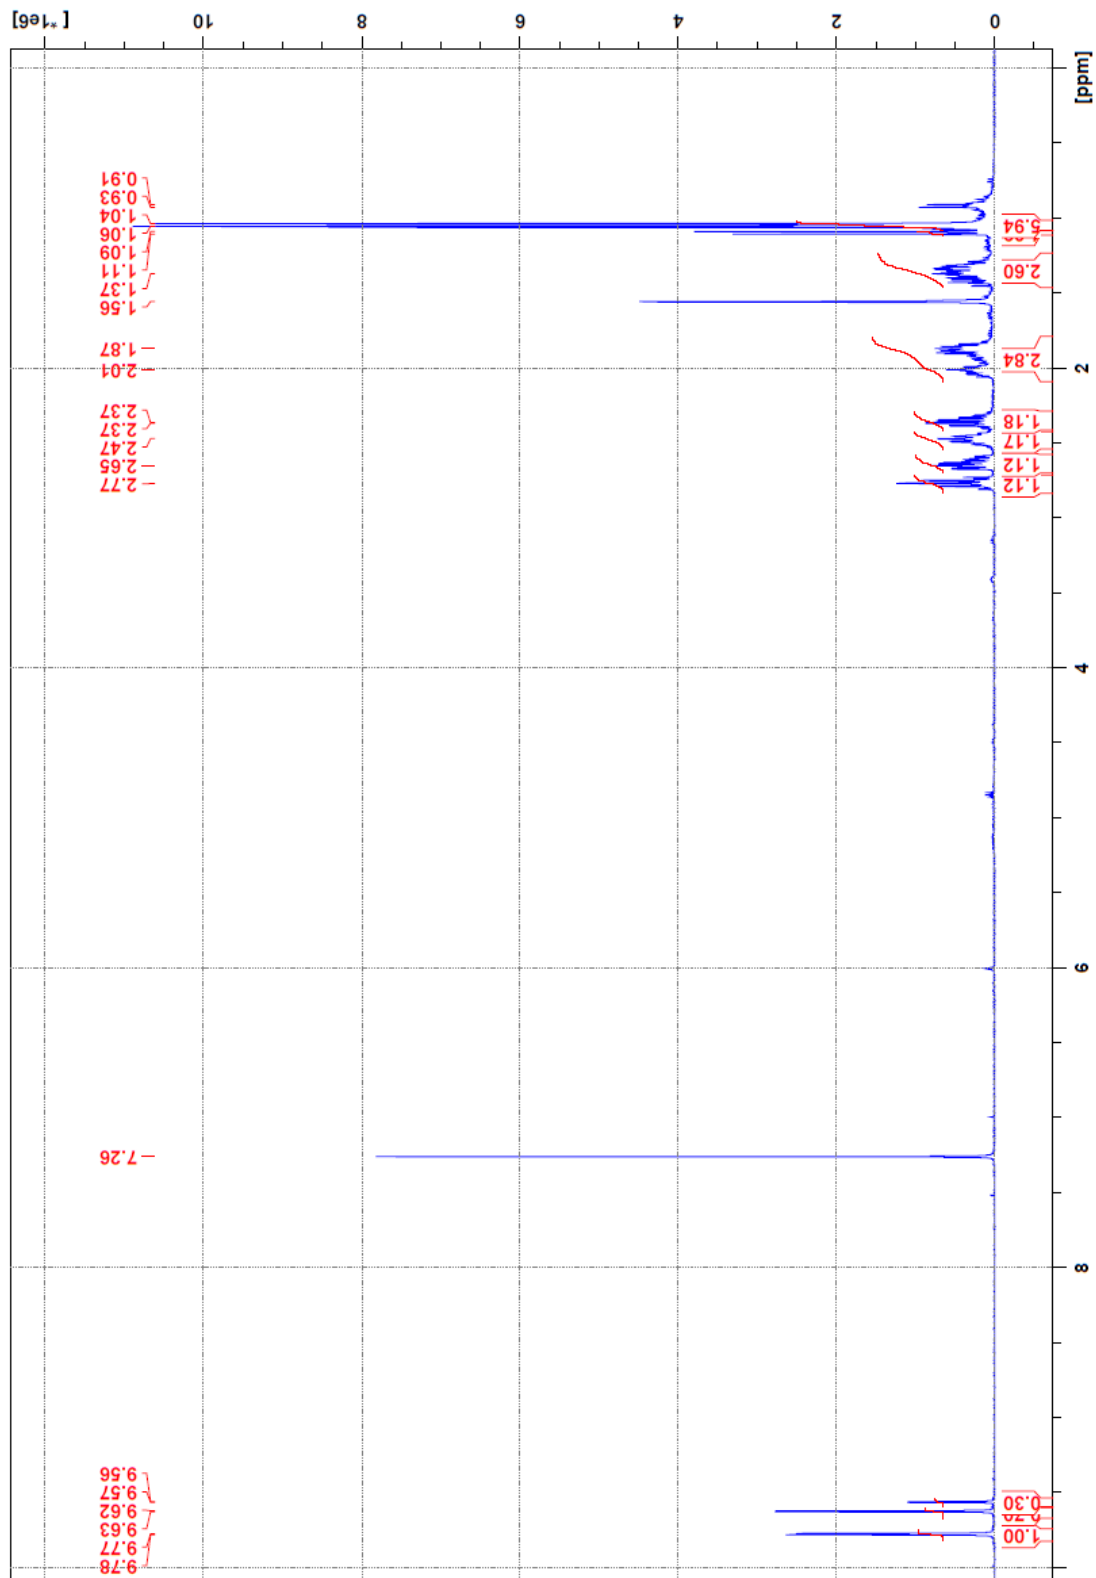

Supplement: mmc1.pdf [file mmc1.pdf]
